# Supplementary material
Source: publisher figshare collection journal article supplement (https://acs.figshare.com/ndownloader/files/13005539)
Supplement: Supplementary file 1 [file 13005539]

Supporting Information

# **Robust Transparent and Conductive Gas Diffusion Multi-Barrier Based on Mg- and Al-Doped ZnO as ITO-Free Electrodes for Organic Electronics**

*Jeong Hyun Kwon<sup>†,‡</sup>, Yongmin Jeon<sup>†</sup>, and Kyung Cheol Choi<sup>\*,†</sup>*

<sup>†</sup> School of Electrical Engineering, KAIST, Daejeon 34141, Republic of Korea

<sup>‡</sup> Advanced Nano-Surface Department, Korea Institute of Materials Science, Changwon, Gyeongnam 51508, Republic of Korea

\* E-mail : [kyungcc@kaist.ac.kr](mailto:kyungcc@kaist.ac.kr)

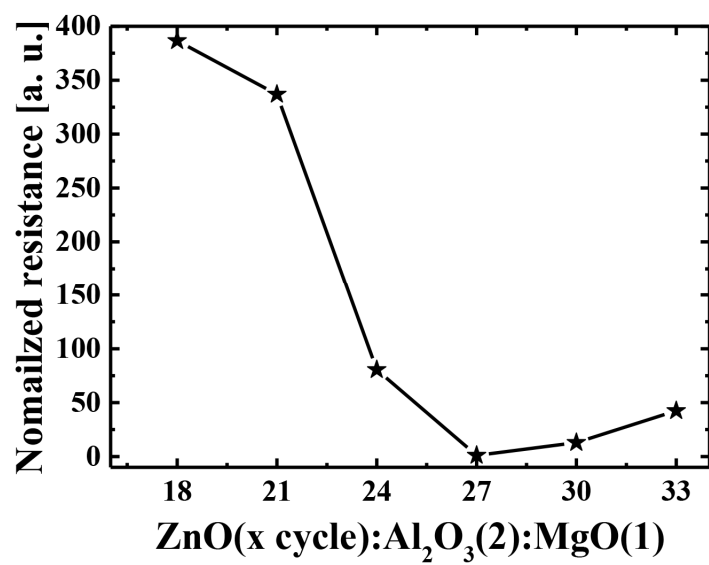

**Figure S1.** Electrical conductivity of the MAZO thin film as a function of the ZnO deposition cycle when the cyclic ratio of Al<sub>2</sub>O<sub>3</sub>:MgO was fixed as 2:1.

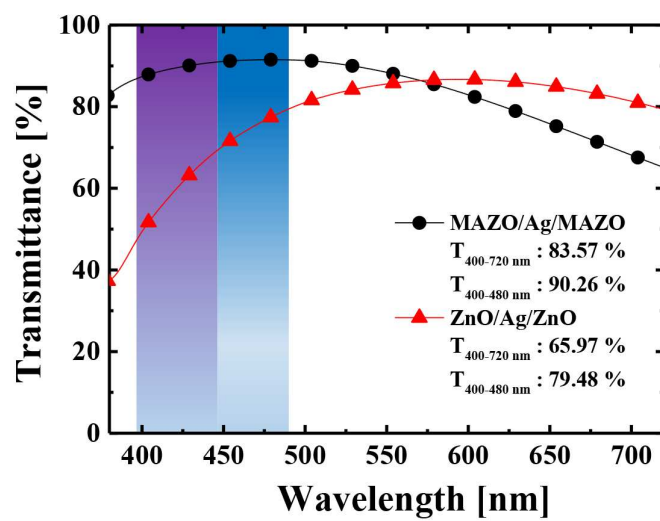

**Figure S2.** Calculated transmittances of the ZnO/Ag/ZnO and MAZO/Ag/MAZO structures in the visible wavelength.

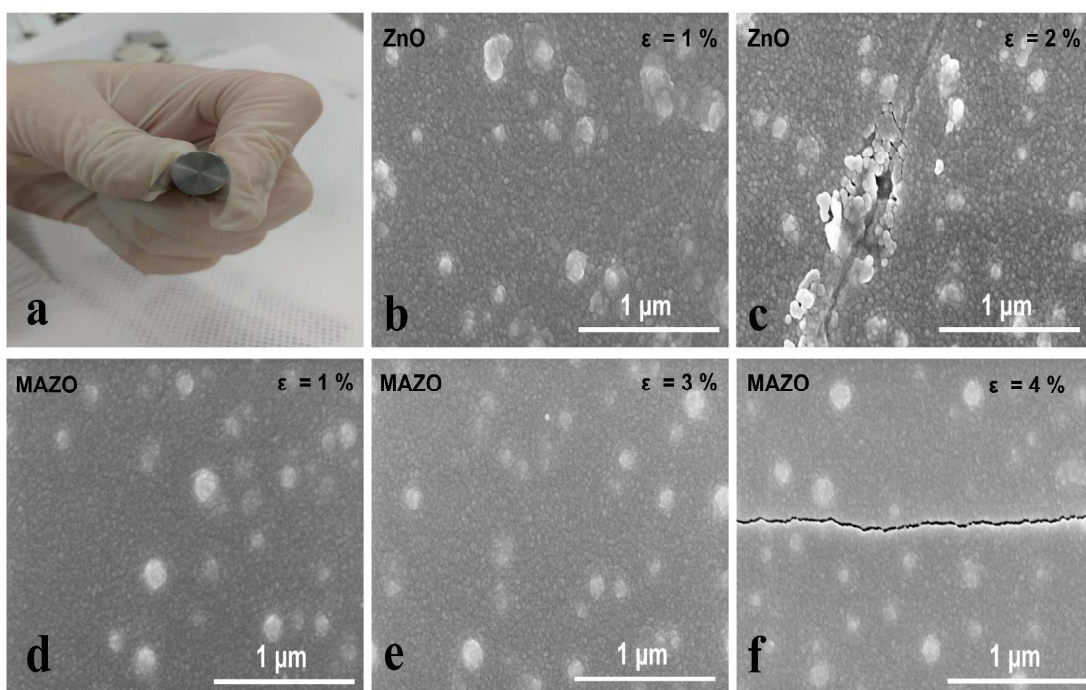

**Figure S3.** a) Photographs showing the tested samples fabricated on PET substrates under tensile bending tests. b) ~ f) Surface SEM images of ZnO and MAZO thin films on PET substrates as a function of bending strain.

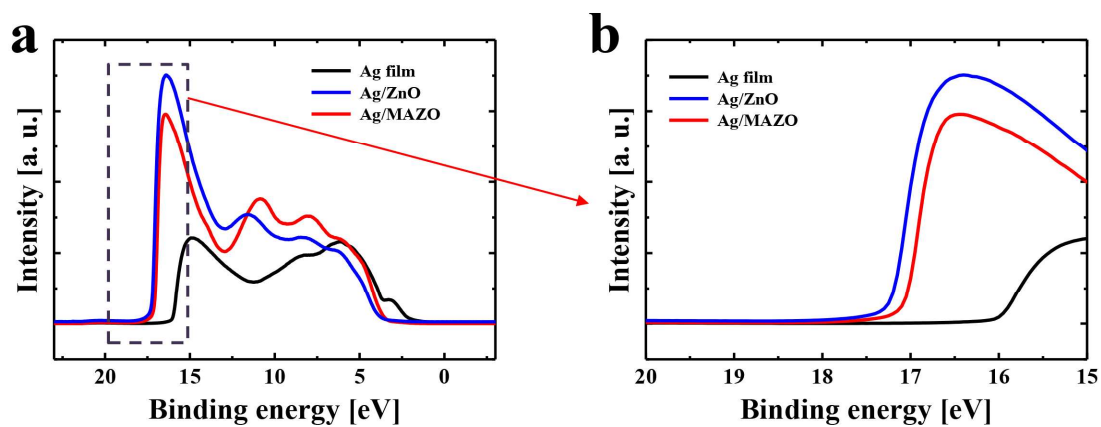

**Figure S4.** a) He(I) UPS spectra of Ag, Ag/ZnO, Ag/MAZO. b) Enlarged view of secondary electron cut-off regions.
